# Supplementary material
Source: publisher figshare collection journal article supplement (https://frontiersin.figshare.com/ndownloader/files/22729661)
Supplement: Supplementary file 1 [file 22729661]

**Appendix 1 Search strategies for bibliographic databases**

**CCRCT (Cochrane Library (Wiley) database, Jan 4 2018**

*Please note since there are no date segments for this database, we searched the entire Cochrane Library and limited to Trials only & year 1990-2018.*

IDSearch
#1 vulnerable road user* or pedestrian* or motor cycl* or motor-cycl* or moto cycl* or moto-cycl* or motocycl* or motorcycl* or motorbike* or motor bike* or motor-bike* or scooter* or moped* or push bike* or push-bike* or bicycl* or cyclist* or cycling or bike* or two wheel* or two-wheel* or 2-wheel* or 2 wheel* or rickshaw* or auto rickshaw* or auto-rickshaw* or tuk tuk or tuk-tuk or non motorise* or non-motorise* or non motorize* or non-motorize* or baby taxi* or baby-taxi* or walk* or walker* or cart or carts or wheelbarrow* or wheel barrow* or wheel-barrow* or moto taxi* or mototaxi* or moto-taxi* or motor taxi* or motortaxi* or motor-taxi* or biking or boda boda or boda-boda or student* (Word variations have been searched)
#2 MeSH descriptor: [Urban Population] explode all trees
#3 MeSH descriptor: [Motorcycles] explode all trees
#4 MeSH descriptor: [Students] explode all trees
#5 #1 or #2 or #3 or #4
#6 MeSH descriptor: [Developing Countries] explode all trees
#7 (austere or (limited near/1 resource*) or (low near/1 resource*) or (transitioning next econom*) or (third next world) or LMIC or LMICs or (lami next countr*) or (transitional next countr*) or (low next gdp) or (low next gnp) or (low next gross next domestic) or (low next gross next national) or ((emerging or developing or (low next income) or (middle next income) or (low near/2 middle) or underdeveloped or under-developed or (less* next developed) or underserved or under-served or deprived or poor*) and (countr* or nation* or econom* or population or world)))
#8 (Afghanistan or Albania or Algeria or Angola or Antigua or Argentina or Armenia* or Aruba or Azerbaijan or Bahrain or Bangladesh or Barbados or Barbuda or Belarus or Byelarus* or Byelorussian or Belorussian or Belorus* or Belize or Benin or Bhutan or Bolivia or Bosnia or Botswana or Brasil or Brazil or Bulgaria or (Burkina next Fas*) or (Upper next Volta) or Burma or Burundi or Cambodia or Khmer or Kampuchea or Cameron* or Cameroon* or (Cape next Verde) or (Cabo next Verde) or (Central next African next Republic) or Chad or Chile or China or Colombia or Comoros or (Comoro next Island*) or Comores or Mayotte or Congo or Kongo or (Cook next Island*) or (Costa next Rica) or (Cote next D'ivoire) or Croatia or Cuba or Cyprus or (Czech next Republic) or Czechoslovakia or Djibouti or Dominica or Dominican or (East next Timor) or (East next Timur) or Ecuador or Egypt or (El-Salvador) or (Equatorial next Guinea) or Eritrea or Estonia or Ethiopia or Fiji or (French next Somaliland) or Futuna or Gabon or (Gabonese next Republic) or Gambia or Gaza or (Georgia* next Republic) or Ghana or Grenada or Guam or Guatemala or Guinea or Guiana or Guyana or Haiti or Herzeg* or Hercegovina or Honduras or Hungary or India or Indonesia or Iran or Iraq or (Ivory next Coast) or Jamaica or Jordan or Kazakh* or Kenya or Kiribati or Korea or Kosovo or (Kyrgyz next Republic) or Kyrgyzstan or Kirghizia or Kirghiz or Kirgizstan or Laos or (Lao* near/1 Democratic next Republic) or (Lao* next PDR) or Latvia or Lebanon or Lesotho or Basutoland or Liberia or Libya or Lithuania or Macedonia or Madagascar or (Magalasy next Republic) or Malawi or Malay* or Sabah or Sarawak or Maldives or Mali or (Marshall next Island*) or Mauritania or Mauritius or (Agalega next Island*) or Mexico or Micronesia or Moldov* or Mongolia or Montserrat or Montenegro or Morocco or Ifni or Mozambique or Myanma* or Namibia or Nauru or Nepal or (Netherlands next Antilles) or (Dutch next Antilles) or (New next Guinea) or (New next Caledonia) or Nicaragua or Niue or Niger or Nigeria or (Northern next Mariana next Island*) or Nyasaland or Oman or Pakistan or Palau or Panama or (Papua next New next Guinea) or PNG or Palestine or Paraguay or Peru or Philipines or Philippines or Phillipines or Phillippines or Poland or (Puerto next Rico) or Yemen or Romania or Roumania or Rumania or Russia* or Rwanda or Ruanda or (Saint next Kitts) or (St next Kitts) or Nevis or (Saint next Vincent) or (St next Vincent) or Grenadines or Samoa* or (Navigator next Island*) or (Saint next Lucia) or (St next Lucia) or (Saint next Helena) or (St next Helena) or (Sao next Tome) or (Saudi next Arabia) or Senegal or Serbia or Seychelles or (Sierra next Leone) or Slovenia or Slovak* or (South next Africa) or (Solomon next Island*) or Somalia or (Sri next Lanka) or Ceylon or Sudan or Surinam* or Swaziland or Syria or Tajikistan or Tadzhikistan or Tadjikistan or Tadzhik or Tanzania or Thailand or Tibet or Timor-Leste or Togo or (Togolese next Republic) or Tokelau or Tonga or Trinidad or Tobago or Tunisia or Turkey or Turkmenistan or Turkmen or Tuvalu or Uganda or Ukraine or Uruguay or Urundi or USSR or (Soviet next Union) or "Union of Soviet Socialist Republics" or Uzbekistan or Vanuatu or (New next Hebrides) or Venezuela or Vietnam or (Viet next Nam) or (Wallis next Futuna) or (United next Arab next Republic) or (West next Bank) or (West next Indies) or Yemen or Yugoslavia or Zaire or Zambia or Zimbabwe or Rhodesia)
#9(africa or americas or caribbean or (central next America) or (latin next America) or (south next America) or (eastern next Europe) or Transcaucasia or antarctic or (atlantic next island*) or (indian next ocean next island*) or (pacific next island*) or polynesia or (central next asia) or (southeast* next asia) or (south-east* next asia) or borneo or mekong or (western next asia) or (middle next east) or (far next east))
#10 #6 or #7 or #8 or #9
#11 conspic* or visib* or illuminat* or protect* or visual or perception or headlight* or head-light* or light* or daytime running* or day time running* or day-time running* or running light* or color* or colour* or contrast* or reflect* or retro reflect* or retro-reflect* or fluorescen* or helmet* or head protect* or head-protect* or cloth* or protective cloth* or protective-cloth* (Word variations have been searched)
#12 wheel* and reflect* (Word variations have been searched)
#13 road safety or road design* or road engineering or geometric design* or traffic engineering or curve* or slope* (Word variations have been searched)
#14 bikeway* or bike way* or bike-way* (Word variations have been searched)
#15 zebra cross* or zebra-cross* (Word variations have been searched)
#16 intersection* and (bicycle box* or bicycle-box* or bike box* or bike-box* or advanced cycle stop* or advanced stop line*) (Word variations have been searched)
#17 (((walkway* or walk way* or walk-way* or path or paths or pathway* or path way* or path-way* or footpath* or foot-path or foot path* or footway* or foot way* or foot-way* or sidewalk* or side walk* or side-walk* or pavement* or platform* or overpass* or underpass* or safety or facility* or track* or mall or malls or refuge island* or refuge-island* or traffic island* or traffic-island* or splitter island* or splitter-island* or median* or raised or grade separat* or grade-separat*) and (actuated controller* or actuated-controller*)) or signal* or timing or countdown or count down or count-down or phase or safety fence* or safety barrier* or lane* or facilit* or boulevard* or track* or path or paths or pathway* or path way* or path-way* or route* or shoulder* or road* hazard* or roadside-hazard* or segregat* or friendly or crossing* or cross walk* or cross-walk or crosswalk* or school cross* or footway* or foot-way* or foot way*) (Word variations have been searched)
#18 roundabout* or round a bout* or round-a-bout* or round about* or round-about* or traffic circle* or intersection* or junction* (Word variations have been searched)
#19 turning traffic or right turn* or left turn* (Word variations have been searched)
#20 (kerb or kerbs or curb or curbs) and radius (Word variations have been searched)
#21 speed and (control* or reduction or limit or limits or countermeasure or counter measure or counter-measure or enforcement or policing or police* or cushion* or table* or hump* or bump* or platform* or plateau* or chicane* or deflection or raised stop line* or road narrowing* or lane width* or lane-width* or gateway* or divert* or diversion* or sign or signs or signage* or signal* or design* or monitor*) (Word variations have been searched)
#22 traffic and (calming or restraint or management) (Word variations have been searched)
#23 speed camera* or red light camera* or red-light camera* (Word variations have been searched)
#24 delineation or pavement mark* or line mark* or line-mark* or rumble strip* or rumble-strip* or reflector* (Word variations have been searched)
#25 MeSH descriptor: [Protective Clothing] explode all trees
#26 MeSH descriptor: [Seat Belts] explode all trees
#27 MeSH descriptor: [Head Protective Devices] explode all trees
#28 MeSH descriptor: [Child Restraint Systems] explode all trees
#29 MeSH descriptor: [Protective Devices] explode all trees
#30 MeSH descriptor: [Environment Design] explode all trees
#31 MeSH descriptor: [Architectural Accessibility] explode all trees
#32 MeSH descriptor: [Law Enforcement] explode all trees
#33 MeSH descriptor: [Social Control, Formal] explode all trees
#34 MeSH descriptor: [Licensure] explode all trees
#35 MeSH descriptor: [Risk Factors] explode all trees
#36 MeSH descriptor: [Risk Reduction Behavior] explode all trees
#37MeSH descriptor: [Health Behavior] explode all trees
#38MeSH descriptor: [Health Education] explode all trees
#39 #11 or #12 or #13 or #14 or #15 or #16 or #17 or #18 or #19 or #20 or #21 or #22 or #23 or #24 or #25 or #26 or #27 or #28 or #29 or #30 or #31 or #32 or #33 or #34 or #35 or #36 or #37 or #38
#40 (school* or work or workplace or work-place or work place or commut* or travel* or occupation* or livelihood* or driver*) and (safety or accident* or crash*) (Word variations have been searched)
#41 MeSH descriptor: [Transportation] explode all trees
#42 MeSH descriptor: [Workplace] explode all trees
#43 MeSH descriptor: [Schools] explode all trees
#44 MeSH descriptor: [Accident Prevention] explode all trees
#45 MeSH descriptor: [Accidents, Traffic] explode all trees
#46 MeSH descriptor: [Walking] explode all trees and with qualifier(s): [Injuries - IN]
#47 MeSH descriptor: [Bicycling] explode all trees and with qualifier(s): [Injuries - IN]
#48 MeSH descriptor: [Wounds and Injuries] explode all trees and with qualifier(s): [Mortality - MO, Prevention & control - PC]
#49 MeSH descriptor: [Craniocerebral Trauma] explode all trees and with qualifier(s): [Mortality - MO, Prevention & control - PC]
#50 MeSH descriptor: [Safety] explode all trees
#51 (Acceptance or Acquiesc* or Adherence or Amenability or Amenableness or Assent* or Complaisance or Complianc* or Concurrence or Conform* or Consent* or Cooperat* or Co-operat* or Deference or Obedience or Observance or Observation or Passivity or Tractability or Willingness) (Word variations have been searched)
#52 #40 or #41 or #42 or #43 or #44 or #45 or #46 or #47 or #48 or #49 or #50 or #51
#53 #5 and #10 and #39 and #52 Publication Year from 1990 to 2018 (Word variations have been searched) = 5532
**CCRCT only = 1891**

**Ovid Embase: 1990 to 2018**

**Date run: Jan 4 2018**

1 ((vulnerable adj road adj user*) or pedestrian* or (motor adj cycl*) or (moto adj cycl*) or moto?cycl* or motorbike* or (motor adj bike*) or scooter* or moped* or (push adj bike*) or bicycl* or cyclist* or cycling or bike* or (two adj wheel*) or 2-wheel* or rickshaw* or (auto adj rickshaw*) or tuk-tuk or (non adj motori#e*) or (baby adj taxi*) or walk* or walker* or cart or carts or wheelbarrow* or (wheel adj barrow*) or moto?taxi* or (moto adj taxi*) or (motor adj taxi*) or biking or boda-boda or student*).af. 866410

2 urban population/ or motorcycle/ or student (134606)

3 1 or 2 (905835)

4 developing country (88809)

5 (austere or (limited adj2 resource*) or (low adj2 resource*) or (transitioning adj econom*) or (third adj world) or LMIC or LMICs or (lami adj countr*) or (transitional adj countr*) or (low adj gdp) or (low adj gnp) or (low adj gross adj domestic) or (low adj gross adj national) or ((emerging or developing or (low adj income) or (middle adj income) or (low adj3 middle) or underdeveloped or under-developed or (less* adj developed) or underserved or under-served or deprived or poor*) and (countr* or nation*1 or econom* or population or world))).tw,kw. (389752)

6 exp Africa (289739)

7 exp "south and central america"/ or mexico (232143)

8 asia/ or far east/ or china/ or exp korea/ or mongolia/ or philippines/ or kazakhstan/ or kyrgyzstan/ or tajikistan/ or turkmenistan/ or uzbekistan/ or middle east/ or iran/ or iraq/ or jordan/ or lebanon/ or oman/ or palestine/ or saudi arabia/ or syrian arab republic/ or "turkey (republic)"/ or yemen/ or southeast asia/ or borneo/ or cambodia/ or indonesia/ or laos/ or malaysia/ or myanmar/ or papua new guinea/ or thailand/ or timor-leste/ or viet nam/ or exp south asia (634728)

9 exp "arctic and antarctic"/ 12013

10 atlantic islands/ or bermuda/ or bouvet island/ or exp caribbean islands/ or "falkland islands (malvinas)"/ or saint helena/ or "saint pierre and miquelon"/ or "sao tome and principe"/ or "south georgia and the south sandwich islands"/ or exp indian ocean/ or exp pacific ocean (75816)

11 (Afghanistan or Albania or Algeria or Angola or Antigua or Argentina or Armenia* or Aruba or Azerbaijan or Bahrain or Bangladesh or Barbados or Barbuda or Belarus or Byelarus* or Byelorussian or Belorussian or Belorus* or Belize or Benin or Bhutan or Bolivia or Bosnia or Botswana or Brasil or Brazil or Bulgaria or (Burkina adj Fas*) or (Upper adj Volta) or Burma or Burundi or Cambodia or Khmer or Kampuchea or Cameron* or Cameroon* or (Cape adj Verde) or (Cabo adj Verde) or (Central adj African adj Republic) or Chad or Chile or China or Colombia or Comoros or (Comoro adj Island*) or Comores or Mayotte or Congo or Kongo or (Cook adj Island*) or (Costa adj Rica) or (Cote adj D'ivoire) or Croatia or Cuba or Cyprus or (Czech adj Republic) or Czechoslovakia or Djibouti or Dominica or Dominican or (East adj Timor) or (East adj Timur) or Ecuador or Egypt or El-Salvador or (Equatorial adj Guinea) or Eritrea or Estonia or Ethiopia or Fiji or (French adj Somaliland) or Futuna or Gabon or (Gabonese adj Republic) or Gambia or Gaza or (Georgia* adj Republic) or Ghana or Grenada or Guam or Guatemala or Guinea or Guiana or Guyana or Haiti or Herzeg* or Hercegovina or Honduras or Hungary or India or Indonesia or Iran or Iraq or (Ivory adj Coast) or Jamaica or Jordan or Kazakh* or Kenya or Kiribati or Korea or Kosovo or (Kyrgyz adj Republic) or Kyrgyzstan or Kirghizia or Kirghiz or Kirgizstan or Laos or (Lao* adj2 Democratic adj Republic) or (Lao* adj PDR) or Latvia or Lebanon or Lesotho or Basutoland or Liberia or Libya or Lithuania or Macedonia or Madagascar or (Magalasy adj Republic) or Malawi or Malay* or Sabah or Sarawak or Maldives or Mali or (Marshall adj Island*) or Mauritania or Mauritius or (Agalega adj Island*) or Mexico or Micronesia or Moldov* or Mongolia or Montserrat or Montenegro or Morocco or Ifni or Mozambique or Myanma* or Namibia or Nauru or Nepal or (Netherlands adj Antilles) or (Dutch adj Antilles) or (New adj Guinea) or (New adj Caledonia) or Nicaragua or Niue or Niger or Nigeria or (Northern adj Mariana adj Island*) or Nyasaland or Oman or Pakistan or Palau or Panama or (Papua adj New adj Guinea) or PNG or Palestine or Paraguay or Peru or Philipines or Philippines or Phillipines or Phillippines or Poland or (Puerto adj Rico) or Yemen or Romania or Roumania or Rumania or Russia* or Rwanda or Ruanda or (Saint adj Kitts) or (St adj Kitts) or Nevis or (Saint adj Vincent) or (St adj Vincent) or Grenadines or Samoa* or (Navigator adj Island*) or (Saint adj Lucia) or (St adj Lucia) or (Saint adj Helena) or (St adj Helena) or (Sao adj Tome) or (Saudi adj Arabia) or Senegal or Serbia or Seychelles or (Sierra adj Leone) or Slovenia or Slovak* or (South adj Africa) or (Solomon adj Island*) or Somalia or (Sri adj Lanka) or Ceylon or Sudan or Surinam* or Swaziland or Syria or Tajikistan or Tadzhikistan or Tadjikistan or Tadzhik or Tanzania or Thailand or Tibet or Timor-Leste or Togo or (Togolese adj Republic) or Tokelau or Tonga or Trinidad or Tobago or Tunisia or Turkey or Turkmenistan or Turkmen or Tuvalu or Uganda or Ukraine or Uruguay or Urundi or USSR or (Soviet adj Union) or "Union of Soviet Socialist Republics" or Uzbekistan or Vanuatu or (New adj Hebrides) or Venezuela or Vietnam or (Viet adj Nam) or (Wallis adj Futuna) or (United adj Arab adj Republic) or (West adj Bank) or (West adj Indies) or Yemen or Yugoslavia or Zaire or Zambia or Zimbabwe or Rhodesia).tw,kw. (1324917)

12 (africa or americas or caribbean or (central adj America) or (latin adj America) or (south adj America) or (eastern adj Europe) or Transcaucasia or antarctic or (atlantic adj island*) or (indian adj ocean adj island*) or (pacific adj island*) or polynesia or (central adj asia) or (southeast* adj asia) or (south-east* adj asia) or borneo or mekong or (western adj asia) or (middle adj east) or (far adj east)).tw,kw. (200016)

13 europe/ or exp eastern europe (331984)

14 4 or 5 or 6 or 7 or 8 or 9 or 10 or 11 or 12 or 13 (2286497)

15 (conspic* or visib* or illuminat* or protect* or visual or perception or headlight* or (head adj light*) or light* or (daytime adj running*) or (day adj time adj running*) or (running adj light*) or colo?r* or contrast* or reflect* or (retro adj reflect*) or fluorescen* or helmet* or (head adj protect*) or cloth* or (protective adj cloth*)).af. (5375879)

16 (wheel* and reflect*).af. (1260)

17 ((road adj safety) or (road adj design*) or (road adj engineering) or (geometric adj design*) or (traffic adj engineering) or curve* or slope*).af. (607336)

18 (bikeway* or (bike adj way*)).af. (13)

19 (zebra adj cross*).af. (26)

20 (intersection* and ((bicycle adj box*) or (bike adj box*) or (advanced adj cycle adj stop*) or (advanced adj stop adj line*))).af. (4)

21 (((walkway* or (walk adj way*) or path* or footpath* or (foot adj path*) or footway* or (foot adj way*) or sidewalk* or (side adj walk*) or pavement* or platform* or overpass* or underpass* or safety or facility* or track* or mall or malls or (refuge adj island*) or (traffic adj island*) or (splitter adj island*) or median* or raised or (grade adj separat*)) and (actuated adj controller*)) or signal* or timing or countdown or (count adj down) or phase or (safety adj fence*) or (safety adj barrier*) or lane* or facilit* or boulevard* or track* or path* or route* or shoulder* or (road* adj hazard*) or segregat* or friendly or crossing* or (cross adj walk*) or crosswalk* or (school adj cross*) or footway* or (foot adj way*)).af. (8926437)

22 (roundabout* or round-a-bout* or (round adj about*) or (traffic adj circle*) or intersection* or junction*).af. (202665)

23 ((turning adj traffic) or (right adj turn*) or (left adj turn*)).af. (445)

24 ((kerb or kerbs or curb or curbs) and radius).af. (11)

25 (speed and (control* or reduction or limit or limits or countermeasure or (counter adj measure) or enforcement or policing or police* or cushion* or table* or hump* or bump* or platform* or plateau* or chicane* or deflection or (raised adj stop adj line*) or (road adj narrowing*) or (lane adj width*) or gateway* or divert* or diversion* or sign* or design* or monitor*)).af. 126174

26 (traffic and (calming or restraint or management)).af. (13942)

27 ((speed adj camera*) or (red adj light adj camera*)).af. (1114)

28 (delineation or (pavement adj mark*) or (line adj mark*) or (rumble adj strip*) or reflector*).af. (32954)

29 helmet/ or seatbelt/ or protective clothing/ or protective equipment/ or child restraint system (30017)

30 licensing/ or driver licence/ or law enforcement (32946)

31 "construction work and architectural phenomena"/ or environmental planning (17350)

32 education/ or health behavior/ or health education/ or high risk behavior/ or risk assessment (958893)

33 or/15-32 (13482868)

34 ((school* or driver* or work or workplace or (work adj place) or commut* or travel* or occupation* or livelihood*) and (safety or accident* or crash*)).af. 383965

35 traffic accident/ or traffic safety/ or safety/ or accident prevention/ or brain injury/pc or head injury/pc or exp skull injury/pc (317688)

36 (Acceptance or Acquiesc* or Adherence or Amenability or Amenableness or Assent* or Complaisance or Complianc* or Concurrence or Conform* or Consent* or Cooperat* or Co-operat* or Deference or Obedience or Observance or Observation or Passivity or Tractability or Willingness).af. (1644637)

37 34 or 35 or 36 (2204846)

38 3 and 14 and 33 and 37 (8442)

39 **limit 38 to (embase and yr="1990 -Current") 3482**

**Ovid MEDLINE(R) Epub Ahead of Print, In-Process & Other Non-Indexed Citations, Ovid MEDLINE(R) Daily, Ovid MEDLINE and Versions(R): 1990 to 2018**

**Date run: Jan 4 2018**

1 ((vulnerable adj road adj user*) or pedestrian* or (motor adj cycl*) or (moto adj cycl*) or moto?cycl* or motorbike* or (motor adj bike*) or scooter* or moped* or (push adj bike*) or bicycl* or cyclist* or cycling or bike* or (two adj wheel*) or 2-wheel* or rickshaw* or (auto adj rickshaw*) or tuk-tuk or (non adj motori#e*) or (baby adj taxi*) or walk* or walker* or cart or carts or wheelbarrow* or (wheel adj barrow*) or moto?taxi* or (moto adj taxi*) or (motor adj taxi*) or biking or boda-boda or student*).af. (598473)

2 urban population/ or motorcycles/ or students (110884)

3 1 or 2 (652741)

4 developing countries (74432)

5 (austere or (limited adj2 resource*) or (low adj2 resource*) or (transitioning adj econom*) or (third adj world) or LMIC or LMICs or (lami adj countr*) or (transitional adj countr*) or (low adj gdp) or (low adj gnp) or (low adj gross adj domestic) or (low adj gross adj national) or ((emerging or developing or (low adj income) or (middle adj income) or (low adj3 middle) or underdeveloped or under-developed or (less* adj developed) or underserved or under-served or deprived or poor*) and (countr* or nation*1 or econom* or population or world))).tw,kf. 336867

6 exp africa (253107)

7 americas/ or exp caribbean region/ or exp central america/ or latin america/ or mexico/ or exp south america (231478)

8 europe/ or exp europe, eastern/ or exp transcaucasia (277619)

9 antarctic regions/ or exp atlantic islands/ or exp indian ocean islands/ or exp pacific islands (74874)

10 New Guinea (2097)

11 asia/ or exp asia, central/ or asia, southeastern/ or borneo/ or cambodia/ or east timor/ or indonesia/ or laos/ or malaysia/ or mekong valley/ or myanmar/ or philippines/ or thailand/ or vietnam/ or asia, western/ or bangladesh/ or bhutan/ or india/ or middle east/ or afghanistan/ or iran/ or iraq/ or jordan/ or lebanon/ or oman/ or saudi arabia/ or syria/ or turkey/ or yemen/ or nepal/ or pakistan/ or sri lanka/ or far east/ or china/ or tibet/ or exp korea/ or mongolia (512306)

12 (Afghanistan or Albania or Algeria or Angola or Antigua or Argentina or Armenia* or Aruba or Azerbaijan or Bahrain or Bangladesh or Barbados or Barbuda or Belarus or Byelarus* or Byelorussian or Belorussian or Belorus* or Belize or Benin or Bhutan or Bolivia or Bosnia or Botswana or Brasil or Brazil or Bulgaria or (Burkina adj Fas*) or (Upper adj Volta) or Burma or Burundi or Cambodia or Khmer or Kampuchea or Cameron* or Cameroon* or (Cape adj Verde) or (Cabo adj Verde) or (Central adj African adj Republic) or Chad or Chile or China or Colombia or Comoros or (Comoro adj Island*) or Comores or Mayotte or Congo or Kongo or (Cook adj Island*) or (Costa adj Rica) or (Cote adj D'ivoire) or Croatia or Cuba or Cyprus or (Czech adj Republic) or Czechoslovakia or Djibouti or Dominica or Dominican or (East adj Timor) or (East adj Timur) or Ecuador or Egypt or El-Salvador or (Equatorial adj Guinea) or Eritrea or Estonia or Ethiopia or Fiji or (French adj Somaliland) or Futuna or Gabon or (Gabonese adj Republic) or Gambia or Gaza or (Georgia* adj Republic) or Ghana or Grenada or Guam or Guatemala or Guinea or Guiana or Guyana or Haiti or Herzeg* or Hercegovina or Honduras or Hungary or India or Indonesia or Iran or Iraq or (Ivory adj Coast) or Jamaica or Jordan or Kazakh* or Kenya or Kiribati or Korea or Kosovo or (Kyrgyz adj Republic) or Kyrgyzstan or Kirghizia or Kirghiz or Kirgizstan or Laos or (Lao* adj2 Democratic adj Republic) or (Lao* adj PDR) or Latvia or Lebanon or Lesotho or Basutoland or Liberia or Libya or Lithuania or Macedonia or Madagascar or (Magalasy adj Republic) or Malawi or Malay* or Sabah or Sarawak or Maldives or Mali or (Marshall adj Island*) or Mauritania or Mauritius or (Agalega adj Island*) or Mexico or Micronesia or Moldov* or Mongolia or Montserrat or Montenegro or Morocco or Ifni or Mozambique or Myanma* or Namibia or Nauru or Nepal or (Netherlands adj Antilles) or (Dutch adj Antilles) or (New adj Guinea) or (New adj Caledonia) or Nicaragua or Niue or Niger or Nigeria or (Northern adj Mariana adj Island*) or Nyasaland or Oman or Pakistan or Palau or Panama or (Papua adj New adj Guinea) or PNG or Palestine or Paraguay or Peru or Philipines or Philippines or Phillipines or Phillippines or Poland or (Puerto adj Rico) or Yemen or Romania or Roumania or Rumania or Russia* or Rwanda or Ruanda or (Saint adj Kitts) or (St adj Kitts) or Nevis or (Saint adj Vincent) or (St adj Vincent) or Grenadines or Samoa* or (Navigator adj Island*) or (Saint adj Lucia) or (St adj Lucia) or (Saint adj Helena) or (St adj Helena) or (Sao adj Tome) or (Saudi adj Arabia) or Senegal or Serbia or Seychelles or (Sierra adj Leone) or Slovenia or Slovak* or (South adj Africa) or (Solomon adj Island*) or Somalia or (Sri adj Lanka) or Ceylon or Sudan or Surinam* or Swaziland or Syria or Tajikistan or Tadzhikistan or Tadjikistan or Tadzhik or Tanzania or Thailand or Tibet or Timor-Leste or Togo or (Togolese adj Republic) or Tokelau or Tonga or Trinidad or Tobago or Tunisia or Turkey or Turkmenistan or Turkmen or Tuvalu or Uganda or Ukraine or Uruguay or Urundi or USSR or (Soviet adj Union) or "Union of Soviet Socialist Republics" or Uzbekistan or Vanuatu or (New adj Hebrides) or Venezuela or Vietnam or (Viet adj Nam) or (Wallis adj Futuna) or (United adj Arab adj Republic) or (West adj Bank) or (West adj Indies) or Yemen or Yugoslavia or Zaire or Zambia or Zimbabwe or Rhodesia).tw,kf. (1108858)

13 (africa or americas or caribbean or (central adj America) or (latin adj America) or (south adj America) or (eastern adj Europe) or Transcaucasia or antarctic or (atlantic adj island*) or (indian adj ocean adj island*) or (pacific adj island*) or polynesia or (central adj asia) or (southeast* adj asia) or (south-east* adj asia) or borneo or mekong or (western adj asia) or (middle adj east) or (far adj east)).tw,kf. (205271)

14 4 or 5 or 6 or 7 or 8 or 9 or 10 or 11 or 12 or 13 (2025056)

15 (conspic* or visib* or illuminat* or protect* or visual or perception or headlight* or (head adj light*) or light* or (daytime adj running*) or (day adj time adj running*) or (running adj light*) or colo?r* or contrast* or reflect* or (retro adj reflect*) or fluorescen* or helmet* or (head adj protect*) or cloth* or (protective adj cloth*)).af. (4697023)

16 (wheel* and reflect*).af. (1030)

17 ((road adj safety) or (road adj design*) or (road adj engineering) or (geometric adj design*) or (traffic adj engineering) or curve* or slope*).af. 483647

18 (bikeway* or (bike adj way*)).af. (9)

19 (zebra adj cross*).af. (41)

20 (intersection* and ((bicycle adj box*) or (bike adj box*) or (advanced adj cycle adj stop*) or (advanced adj stop adj line*))).af. (4)

21 (((walkway* or (walk adj way*) or path* or footpath* or (foot adj path*) or footway* or (foot adj way*) or sidewalk* or (side adj walk*) or pavement* or platform* or overpass* or underpass* or safety or facility* or track* or mall or malls or (refuge adj island*) or (traffic adj island*) or (splitter adj island*) or median* or raised or (grade adj separat*)) and (actuated adj controller*)) or signal* or timing or countdown or (count adj down) or phase or (safety adj fence*) or (safety adj barrier*) or lane* or facilit* or boulevard* or track* or path* or route* or shoulder* or (road* adj hazard*) or segregat* or friendly or crossing* or (cross adj walk*) or crosswalk* or (school adj cross*) or footway* or (foot adj way*)).af. (8184375)

22 (roundabout* or round-a-bout* or (round adj about*) or (traffic adj circle*) or intersection* or junction*).af. (191474)

23 ((turning adj traffic) or (right adj turn*) or (left adj turn*)).af. (431)

24 ((kerb or kerbs or curb or curbs) and radius).af. (7)

25 (speed and (control* or reduction or limit or limits or countermeasure or (counter adj measure) or enforcement or policing or police* or cushion* or table* or hump* or bump* or platform* or plateau* or chicane* or deflection or (raised adj stop adj line*) or (road adj narrowing*) or (lane adj width*) or gateway* or divert* or diversion* or sign* or design* or monitor*)).af. 98473

26 (traffic and (calming or restraint or management)).af. (7178)

27 ((speed adj camera*) or (red adj light adj camera*)).af. (1073)

28 (delineation or (pavement adj mark*) or (line adj mark*) or (rumble adj strip*) or reflector*).af. (22618)

29 protective clothing/ut or seat belts/ut or head protective devices/ut or child restraint systems/ut or protective devices/ut (2934)

30 environment design/ or architectural accessibility/mt, lj (6098)

31 law enforcement/ or social control, formal/ or licensure (21627)

32 risk factors/ or risk reduction behavior/ or health behavior/ or health education (888185)

33 or/15-32 (12059104)

34 ((school* or driver* or work or workplace or (work adj place) or commut* or travel* or occupation* or livelihood*) and (safety or accident* or crash*)).af. (205935)

35 transportation/ or workplace/ or schools/ (63343)

36 accident prevention/ or *accidents, traffic/ or accidents, traffic/mo, pc, lj or walking/in or bicycling/in or "Wounds and Injuries"/mo, pc or exp craniocerebral trauma/mo, pc or safety/ 88286

37 (Acceptance or Acquiesc* or Adherence or Amenability or Amenableness or Assent* or Complaisance or Complianc* or Concurrence or Conform* or Consent* or Cooperat* or Co-operat* or Deference or Obedience or Observance or Observation or Passivity or Tractability or Willingness).af. (1488858)

38 34 or 35 or 36 or 37 (1791119)

39 3 and 14 and 33 and 38 (7576)

40 **limit 39 to yr="1990 -Current" (7286)**

**Ovid Transport: Transport Database Pre-1987 to November 2017**

**Date run: Jan 4 2018**

1 ((vulnerable adj road adj user*) or pedestrian* or (motor adj cycl*) or (moto adj cycl*) or moto?cycl* or motorbike* or (motor adj bike*) or scooter* or moped* or (push adj bike*) or bicycl* or cyclist* or cycling or bike* or (two adj wheel*) or 2-wheel* or rickshaw* or (auto adj rickshaw*) or tuk-tuk or (non adj motori#e*) or (baby adj taxi*) or walk* or walker* or cart or carts or wheelbarrow* or (wheel adj barrow*) or moto?taxi* or (moto adj taxi*) or (motor adj taxi*) or biking or boda-boda or student*).af. (50995)

2 (pedestrians and bicyclists).cs. (10332)

3 1 or 2 (50995)

4 (austere or (limited adj2 resource*) or (low adj2 resource*) or (transitioning adj econom*) or (third adj world) or LMIC or LMICs or (lami adj countr*) or (transitional adj countr*) or (low adj gdp) or (low adj gnp) or (low adj gross adj domestic) or (low adj gross adj national) or ((emerging or developing or (low adj income) or (middle adj income) or (low adj3 middle) or underdeveloped or under-developed or (less* adj developed) or underserved or under-served or deprived or poor*) and (countr* or nation*1 or econom* or population or world))).af. (23234)

5 (Afghanistan or Albania or Algeria or Angola or Antigua or Argentina or Armenia* or Aruba or Azerbaijan or Bahrain or Bangladesh or Barbados or Barbuda or Belarus or Byelarus* or Byelorussian or Belorussian or Belorus* or Belize or Benin or Bhutan or Bolivia or Bosnia or Botswana or Brasil or Brazil or Bulgaria or (Burkina adj Fas*) or (Upper adj Volta) or Burma or Burundi or Cambodia or Khmer or Kampuchea or Cameron* or Cameroon* or (Cape adj Verde) or (Cabo adj Verde) or (Central adj African adj Republic) or Chad or Chile or China or Colombia or Comoros or (Comoro adj Island*) or Comores or Mayotte or Congo or Kongo or (Cook adj Island*) or (Costa adj Rica) or (Cote adj D'ivoire) or Croatia or Cuba or Cyprus or (Czech adj Republic) or Czechoslovakia or Djibouti or Dominica or Dominican or (East adj Timor) or (East adj Timur) or Ecuador or Egypt or El-Salvador or (Equatorial adj Guinea) or Eritrea or Estonia or Ethiopia or Fiji or (French adj Somaliland) or Futuna or Gabon or (Gabonese adj Republic) or Gambia or Gaza or (Georgia* adj Republic) or Ghana or Grenada or Guam or Guatemala or Guinea or Guiana or Guyana or Haiti or Herzeg* or Hercegovina or Honduras or Hungary or India or Indonesia or Iran or Iraq or (Ivory adj Coast) or Jamaica or Jordan or Kazakh* or Kenya or Kiribati or Korea or Kosovo or (Kyrgyz adj Republic) or Kyrgyzstan or Kirghizia or Kirghiz or Kirgizstan or Laos or (Lao* adj2 Democratic adj Republic) or (Lao* adj PDR) or Latvia or Lebanon or Lesotho or Basutoland or Liberia or Libya or Lithuania or Macedonia or Madagascar or (Magalasy adj Republic) or Malawi or Malay* or Sabah or Sarawak or Maldives or Mali or (Marshall adj Island*) or Mauritania or Mauritius or (Agalega adj Island*) or Mexico or Micronesia or Moldov* or Mongolia or Montserrat or Montenegro or Morocco or Ifni or Mozambique or Myanma* or Namibia or Nauru or Nepal or (Netherlands adj Antilles) or (Dutch adj Antilles) or (New adj Guinea) or (New adj Caledonia) or Nicaragua or Niue or Niger or Nigeria or (Northern adj Mariana adj Island*) or Nyasaland or Oman or Pakistan or Palau or Panama or (Papua adj New adj Guinea) or PNG or Palestine or Paraguay or Peru or Philipines or Philippines or Phillipines or Phillippines or Poland or (Puerto adj Rico) or Yemen or Romania or Roumania or Rumania or Russia* or Rwanda or Ruanda or (Saint adj Kitts) or (St adj Kitts) or Nevis or (Saint adj Vincent) or (St adj Vincent) or Grenadines or Samoa* or (Navigator adj Island*) or (Saint adj Lucia) or (St adj Lucia) or (Saint adj Helena) or (St adj Helena) or (Sao adj Tome) or (Saudi adj Arabia) or Senegal or Serbia or Seychelles or (Sierra adj Leone) or Slovenia or Slovak* or (South adj Africa) or (Solomon adj Island*) or Somalia or (Sri adj Lanka) or Ceylon or Sudan or Surinam* or Swaziland or Syria or Tajikistan or Tadzhikistan or Tadjikistan or Tadzhik or Tanzania or Thailand or Tibet or Timor-Leste or Togo or (Togolese adj Republic) or Tokelau or Tonga or Trinidad or Tobago or Tunisia or Turkey or Turkmenistan or Turkmen or Tuvalu or Uganda or Ukraine or Uruguay or Urundi or USSR or (Soviet adj Union) or "Union of Soviet Socialist Republics" or Uzbekistan or Vanuatu or (New adj Hebrides) or Venezuela or Vietnam or (Viet adj Nam) or (Wallis adj Futuna) or (United adj Arab adj Republic) or (West adj Bank) or (West adj Indies) or Yemen or Yugoslavia or Zaire or Zambia or Zimbabwe or Rhodesia).af. (89656)

6 (africa or americas or caribbean or (central adj America) or (latin adj America) or (south adj America) or (eastern adj Europe) or Transcaucasia or antarctic or (atlantic adj island*) or (indian adj ocean adj island*) or (pacific adj island*) or polynesia or (central adj asia) or (southeast* adj asia) or (south-east* adj asia) or borneo or mekong or (western adj asia) or (middle adj east) or (far adj east)).af. (19035)

7 4 or 5 or 6 (115948)

8 (conspic* or visib* or illuminat* or protect* or visual or perception or headlight* or (head adj light*) or light* or (daytime adj running*) or (day adj time adj running*) or (running adj light*) or colo?r* or contrast* or reflect* or (retro adj reflect*) or fluorescen* or helmet* or (head adj protect*) or cloth* or (protective adj cloth*)).af. (135816)

9 (wheel* and reflect*).af. (423)

10 ((road adj safety) or (road adj design*) or (road adj engineering) or (geometric adj design*) or (traffic adj engineering) or curve* or slope*).af. (57180)

11 (bikeway* or (bike adj way*)).af. (1067)

12 (zebra adj cross*).af. (216)

13 (intersection* and ((bicycle adj box*) or (bike adj box*) or (advanced adj cycle adj stop*) or (advanced adj stop adj line*))).af. (19)

14 (((walkway* or (walk adj way*) or path* or footpath* or (foot adj path*) or footway* or (foot adj way*) or sidewalk* or (side adj walk*) or pavement* or platform* or overpass* or underpass* or safety or facility* or track* or mall or malls or (refuge adj island*) or (traffic adj island*) or (splitter adj island*) or median* or raised or (grade adj separat*)) and (actuated adj controller*)) or signal* or timing or countdown or (count adj down) or phase or (safety adj fence*) or (safety adj barrier*) or lane* or facilit* or boulevard* or track* or path* or route* or shoulder* or (road* adj hazard*) or segregat* or friendly or crossing* or (cross adj walk*) or crosswalk* or (school adj cross*) or footway* or (foot adj way*)).af. (271992)

15 (roundabout* or round-a-bout* or (round adj about*) or (traffic adj circle*) or intersection* or junction*).af. (23131)

16 ((turning adj traffic) or (right adj turn*) or (left adj turn*)).af. (3074)

17 ((kerb or kerbs or curb or curbs) and radius).af. (43)

18 (speed and (control* or reduction or limit or limits or countermeasure or (counter adj measure) or enforcement or policing or police* or cushion* or table* or hump* or bump* or platform* or plateau* or chicane* or deflection or (raised adj stop adj line*) or (road adj narrowing*) or (lane adj width*) or gateway* or divert* or diversion* or sign* or design* or monitor*)).af. (47142)

19 (traffic and (calming or restraint or management)).af. (119229)

20 ((speed adj camera*) or (red adj light adj camera*)).af. (809)

21 (delineation or (pavement adj mark*) or (line adj mark*) or (rumble adj strip*) or reflector*).af. (4035)

22 (safety devices used in transport infrastructure or (safety and human factors) or traffic control or (operations and traffic management) or policy or (traffic and transport planning)).cs. (259240)

23 ((risk adj factor*) or (risk adj reduction) or (risk adj analys*) or (risk adj taking) or (safety adj program*)).af. (10695)

24 (law adj enforcement).af. (6113)

25 ((protective adj cloth*) or (seat adj belt*1) or seatbelt*1 or (head adj protective adj device*) or (child adj restraint) or (car adj seat*1)).af. (7874)

26 or/8-25 (539473)

27 ((school* or work or workplace* or work place* or travel* or occupation* or livelihood* or driver* or commute* or commuting) and (safety or accident* or crash*)).af. 87785

28 ((accidents and the human factor) or accident studies or personal injuries).cs. (51060)

29 (accident* and (prevention or traffic*)).af. (69131)

30 (injuries or trauma).af. (22984)

31 (Acceptance or Acquiesc* or Adherence or Amenability or Amenableness or Assent* or Complaisance or Complianc* or Concurrence or Conform* or Consent* or Cooperat* or Co-operat* or Deference or Obedience or Observance or Observation or Passivity or Tractability or Willingness).af. (52023)

32 27 or 28 or 29 or 30 or 31 (172043)

33 3 and 7 and 26 and 32 (2826)

34 **limit 33 to yr="1990 -Current" (2375)**

**Proquest ERIC:**

**Date run: Jan 4 2018**

(vulnerable road user* OR pedestrian* OR motor cycl* OR motor-cycl* OR moto cycl* OR moto-cycl* OR motocycl* OR motorcycl* OR motorbike* OR motor bike* OR motor-bike* OR scooter* OR moped* OR push bike* OR push-bike* OR bicycl* OR cyclist* OR cycling OR bike* OR two wheel* OR two-wheel* OR 2-wheel* OR 2 wheel* OR rickshaw* OR auto rickshaw* OR auto-rickshaw* OR tuk tuk OR tuk-tuk OR non motorise* OR non-motorise* OR non motorize* OR non-motorize* OR baby taxi* OR baby-taxi* OR walk* OR walker* OR cart OR carts OR wheelbarrow* OR wheel barrow* OR wheel-barrow* OR moto taxi* OR mototaxi* OR moto-taxi* OR motor taxi* OR motortaxi* OR motor-taxi* OR biking OR boda boda OR boda-boda OR student*)

AND ((austere OR limited resource* OR "resource limited" OR low resource* OR transitioning econom* OR lami countr* OR transitional countr* OR "low gdp" OR "low gnp" OR "low gross domestic" OR "low gross national" OR ((emerging OR developing OR "low income" OR "middle income" OR (low AND middle) OR underdeveloped OR "under developed" OR under-developed OR underserved OR "under served" OR under-served OR (less* AND developed) OR derived OR poor) AND (countr* OR nation* OR econom* OR population OR world)) OR "third world" OR lmic OR lmics) OR afghanistan OR albania OR algeria OR angola OR antigua OR argentina OR Armenia* OR aruba OR azerbaijan OR bahrain OR bangladesh OR barbados OR barbuda OR belarus OR Byelarus* OR byelorussian OR Belorus* OR belize OR benin OR bhutan OR bolivia OR bosnia OR botswana OR brasil OR brazil OR bulgaria OR burkina Fas* OR "Upper Volta" OR burma OR burundi OR cambodia OR khmer OR kampuchea OR Cameron* OR Cameroon* OR "Cape Verde" OR "Cabo Verde" OR "Central African Republic" OR chad OR chile OR china OR colombia OR comoros OR comoro Island* OR comores OR mayotte OR congo OR kongo OR cook Island* OR "Costa Rica" OR "Cote D'ivoire" OR croatia OR cuba OR cyprus OR "Czech Republic" OR czechoslovakia OR djibouti OR dominica OR dominican OR "East Timor" OR "East Timur" OR ecuador OR egypt OR el-salvador OR "Equatorial Guinea" OR eritrea OR estonia OR ethiopia OR fiji OR "French Somaliland" OR futuna OR gabon OR "Gabonese Republic" OR gambia OR gaza OR (Georgia* AND republic) OR ghana OR grenada OR guam OR guatemala OR guinea OR guiana OR guyana OR haiti OR Herzeg* OR hercegovina OR honduras OR hungary OR india OR indonesia OR iran OR iraq OR "Ivory Coast" OR jamaica OR jordan OR Kazakh* OR kenya OR kiribati OR korea OR kosovo OR "Kyrgyz Republic" OR kyrgyzstan OR kirghizia OR kirghiz OR kyrgyzstan OR Lao OR laos OR latvia OR lebanon OR lesotho OR basutoland OR liberia OR libya OR lithuania OR macedonia OR madagascar OR "Magalasy Republic" OR malawi OR Malay* OR sabah OR sarawak OR maldives OR mali OR marshall Island* OR mauritania OR mauritius OR galega Island* OR mexico OR micronesia OR Moldov* OR mongolia OR montserrat OR montenegro OR morocco OR ifni OR mozambique OR Myanma* OR namibia OR nauru OR nepal OR "Netherlands Antilles" OR "Dutch Antilles" OR "New Guinea" OR "New Caledonia" OR nicaragua OR niue OR niger OR nigeria OR ("Northern Mariana" AND Island*) OR nyasaland OR oman OR pakistan OR palau OR panama OR "Papua New Guinea" OR PNG OR palestine OR paraguay OR peru OR philippines OR philippines OR philippines OR philippines OR poland OR "Puerto Rico" OR yemen OR romania OR roumania OR rumania OR Russia* OR rwanda OR ruanda OR "Saint Kitts" OR "St Kitts" OR nevis OR "Saint Vincent" OR "St Vincent" OR grenadines OR Samoa* OR navigator Island* OR "Saint Lucia" OR "St Lucia" OR "Saint Helena" OR "St Helena" OR "Sao Tome" OR "Saudi Arabia" OR senegal OR serbia OR seychelles OR "Sierra Leone" OR slovenia OR Slovak* OR "South Africa" OR solomon Island* OR somalia OR "Sri Lanka" OR ceylon OR sudan OR Surinam* OR swaziland OR syria OR tajikistan OR tadzhikistan OR tadjikistan OR tadzhik OR tanzania OR thailand OR tibet OR timor-leste OR togo OR "Togolese Republic" OR tokelau OR tonga OR trinidad OR tobago OR tunisia OR turkey OR turkmenistan OR turkmen OR tuvalu OR uganda OR ukraine OR uruguay OR urundi OR ussr OR "Soviet Union" OR "Union of Soviet Socialist Republics" OR uzbekistan OR vanuatu OR "New Hebrides" OR venezuela OR vietnam OR "Viet Nam" OR "Wallis Futuna" OR "United Arab Republic" OR "West Bank" OR "West Indies" OR yemen OR yugoslavia OR zaire OR zambia OR zimbabwe OR rhodesia OR africa OR americas OR caribbean OR "central America" OR "latin America" OR "south America" OR "eastern Europe" OR transcaucasia OR antarctic OR atlantic island* OR "indian ocean" OR pacific island* OR polynesia OR "central asia" OR (southeast* AND asia) OR (south-east* AND asia) OR "south east asia" OR "south eastern asia" OR borneo OR mekong OR "western asia" OR "middle east" OR "far east")

AND ((conspic* OR visib* OR illuminat* OR protect* OR visual OR perception OR headlight* OR head-light* OR light* OR daytime running* OR day time running* OR day-time running* OR running light* OR color* OR colour* OR contrast* OR reflect* OR retro reflect* OR retro-reflect* OR fluorescen* OR helmet* OR head protect* OR head-protect* OR cloth* OR protective cloth* OR protective-cloth* OR seatbelt* OR seat belt*) OR (wheel* AND reflect*) OR (road safety OR road design* OR road engineering OR geometric design* OR traffic engineering OR curve* OR slope*) OR (bikeway* OR bike way* OR bike-way*) OR (zebra cross* OR zebra-cross*) OR (intersection* AND (bicycle box* OR bicycle-box* OR bike box* OR bike-box* OR advanced cycle stop* OR advanced stop line*)) OR (((walkway* OR walk way* OR walk-way* OR path OR paths OR pathway* OR path way* OR path-way* OR footpath* OR foot-path OR foot path* OR footway* OR foot way* OR foot-way* OR sidewalk* OR side walk* OR side-walk* OR pavement* OR platform* OR overpass* OR underpass* OR safety OR facility* OR track* OR mall OR malls OR refuge island* OR refuge-island* OR traffic island* OR traffic-island* OR splitter island* OR splitter-island* OR median* OR raised OR grade separat* OR grade-separat*) AND (actuated controller* OR actuated-controller*)) OR signal* OR timing OR countdown OR count down OR count-down OR phase OR safety fence* OR safety barrier* OR lane* OR facilit* OR boulevard* OR track* OR path OR paths OR pathway* OR path way* OR path-way* OR route* OR shoulder* OR road hazard* OR roadside-hazard* OR segregat* OR friendly OR crossing* OR cross walk* OR cross-walk OR crosswalk* OR school cross* OR footway* OR foot-way* OR foot way*) OR (roundabout* OR round a bout* OR round-a-bout* OR round about* OR round-about* OR traffic circle* OR intersection* OR junction*) OR (turning traffic OR right turn* OR left turn*) OR ((kerb OR kerbs OR curb OR curbs) AND radius) OR (speed AND (control* OR reduction OR limit OR limits OR countermeasure OR counter measure OR counter-measure OR enforcement OR policing OR police* OR cushion* OR table* OR hump* OR bump* OR platform* OR plateau* OR chicane* OR deflection OR raised stop line* OR road narrowing* OR lane width* OR lane-width* OR gateway* OR divert* OR diversion* OR sign OR signs OR signage* OR signal* OR design* OR monitor*)) OR (traffic AND (calming OR restraint OR management)) OR (speed camera* OR red light camera* OR red-light camera*) OR (delineation OR pavement mark* OR line mark* OR line-mark* OR rumble strip* OR rumble-strip* OR reflector*))

AND (((school* OR work OR workplace OR work-place OR work place OR commut* OR travel* OR occupation* OR livelihood* OR driver*)

AND (safety OR accident*)) OR Acceptance OR Acquiesc* OR Adherence OR Amenability OR Amenableness OR Assent* OR Complaisance OR Complianc* OR Concurrence OR Conform* OR Consent* OR Cooperat* OR Co-operat* OR Deference OR Obedience OR Observance OR Observation OR Passivity OR Tractability OR Willingness)

AND pd(1990-2018)

AND peer reviewed

**Results = 3316**

**PubMed**

**Run date Jan 4 2018**

((vulnerable road user* OR pedestrian* OR motor cycle* OR motor cyclist* OR moto cycle* OR moto cyclist* OR motocycle* OR motocyclist* OR motorcycle* OR motorcyclist* OR motorbike* OR motor bike* OR scooter* OR moped* OR push bike* OR bicycl* OR cyclist* OR cycling OR bike* OR two wheel* OR 2 wheel* OR rickshaw* OR auto rickshaw* OR tuk tuk OR non motorise* OR non motorize* OR baby taxi* OR walk* OR walker* OR cart OR carts OR wheelbarrow* OR wheel barrow* OR moto taxi* OR mototaxi* OR motor taxi* OR motortaxi* OR biking OR boda boda OR student*) OR ("urban population"[Mesh:noexp] OR "motorcycles"[Mesh:noexp] OR "students"[Mesh:noexp])) AND ("Developing Countries"[Mesh] OR (austere OR limited resource* OR "resource limited" OR low resource* OR transitioning econom* OR lami countr* OR transitional countr* OR "low gdp" OR "low gnp" OR "low gross domestic" OR "low gross national" OR ((emerging OR developing OR "low income" OR "middle income" OR (low AND middle) OR underdeveloped OR "under developed" OR under-developed OR underserved OR "under served" OR under-served OR (less* AND developed) OR deprived OR poor) AND (countr* OR nation* OR econom* OR population OR world)) OR "third world" OR LMIC OR LMICs) OR "Africa"[Mesh] OR "americas"[Mesh] OR "caribbean region"[Mesh] OR "central america"[Mesh] OR "latin america"[Mesh] OR "mexico"[Mesh] OR "south america"[Mesh] OR "europe"[Mesh] OR "europe, eastern"[Mesh] OR "transcaucasia"[Mesh] OR "antarctic regions"[Mesh] OR "atlantic islands"[Mesh] OR "indian ocean islands"[Mesh] OR "pacific islands"[Mesh] OR "New Guinea"[Mesh] OR Afghanistan OR Albania OR Algeria OR Angola OR Antigua OR Argentina OR Armenia* OR Aruba OR Azerbaijan OR Bahrain OR Bangladesh OR Barbados OR Barbuda OR Belarus OR Byelarus* OR Byelorussian OR Belorus* OR Belize OR Benin OR Bhutan OR Bolivia OR Bosnia OR Botswana OR Brasil OR Brazil OR Bulgaria OR Burkina Fas* OR "Upper Volta" OR Burma OR Burundi OR Cambodia OR Khmer OR Kampuchea OR Cameron* OR Cameroon* OR "Cape Verde" OR "Cabo Verde" OR "Central African Republic" OR Chad OR Chile OR China OR Colombia OR Comoros OR Comoro Island* OR Comores OR Mayotte OR Congo OR Kongo OR Cook Island* OR "Costa Rica" OR "Cote D'ivoire" OR Croatia OR Cuba OR Cyprus OR "Czech Republic" OR Czechoslovakia OR Djibouti OR Dominica OR Dominican OR "East Timor" OR "East Timur" OR Ecuador OR Egypt OR El-Salvador OR "Equatorial Guinea" OR Eritrea OR Estonia OR Ethiopia OR Fiji OR "French Somaliland" OR Futuna OR Gabon OR "Gabonese Republic" OR Gambia OR Gaza OR (Georgia* AND Republic) OR Ghana OR Grenada OR Guam OR Guatemala OR Guinea OR Guiana OR Guyana OR Haiti OR Herzeg* OR Hercegovina OR Honduras OR Hungary OR India OR Indonesia OR Iran OR Iraq OR "Ivory Coast" OR Jamaica OR Jordan OR Kazakh* OR Kenya OR Kiribati OR Korea OR Kosovo OR "Kyrgyz Republic" OR Kyrgyzstan OR Kirghizia OR Kirghiz OR Kirgizstan OR Lao OR Laos OR Latvia OR Lebanon OR Lesotho OR Basutoland OR Liberia OR Libya OR Lithuania OR Macedonia OR Madagascar OR "Magalasy Republic" OR Malawi OR Malay* OR Sabah OR Sarawak OR Maldives OR Mali OR Marshall Island* OR Mauritania OR Mauritius OR Agalega Island* OR Mexico OR Micronesia OR Moldov* OR Mongolia OR Montserrat OR Montenegro OR Morocco OR Ifni OR Mozambique OR Myanma* OR Namibia OR Nauru OR Nepal OR "Netherlands Antilles" OR "Dutch Antilles" OR "New Guinea" OR "New Caledonia" OR Nicaragua OR Niue OR Niger OR Nigeria OR ("Northern Mariana" AND Island*) OR Nyasaland OR Oman OR Pakistan OR Palau OR Panama OR "Papua New Guinea" OR PNG OR Palestine OR Paraguay OR Peru OR Philipines OR Philippines OR Phillipines OR Phillippines OR Poland OR "Puerto Rico" OR Yemen OR Romania OR Roumania OR Rumania OR Russia* OR Rwanda OR Ruanda OR "Saint Kitts" OR "St Kitts" OR Nevis OR "Saint Vincent" OR "St Vincent" OR Grenadines OR Samoa* OR Navigator Island* OR "Saint Lucia" OR "St Lucia" OR "Saint Helena" OR "St Helena" OR "Sao Tome" OR "Saudi Arabia" OR Senegal OR Serbia OR Seychelles OR "Sierra Leone" OR Slovenia OR Slovak* OR "South Africa" OR Solomon Island* OR Somalia OR "Sri Lanka" OR Ceylon OR Sudan OR Surinam* OR Swaziland OR Syria OR Tajikistan OR Tadzhikistan OR Tadjikistan OR Tadzhik OR Tanzania OR Thailand OR Tibet OR Timor-Leste OR Togo OR "Togolese Republic" OR Tokelau OR Tonga OR Trinidad OR Tobago OR Tunisia OR Turkey OR Turkmenistan OR Turkmen OR Tuvalu OR Uganda OR Ukraine OR Uruguay OR Urundi OR USSR OR "Soviet Union" OR "Union of Soviet Socialist Republics" OR Uzbekistan OR Vanuatu OR "New Hebrides" OR Venezuela OR Vietnam OR "Viet Nam" OR "Wallis Futuna" OR "United Arab Republic" OR "West Bank" OR "West Indies" OR Yemen OR Yugoslavia OR Zaire OR Zambia OR Zimbabwe OR Rhodesia OR africa OR americas OR caribbean OR "central America" OR "latin America" OR "south America" OR "eastern Europe" OR Transcaucasia OR antarctic OR atlantic island* OR "indian ocean" OR pacific island* OR polynesia OR "central asia" OR (southeast* AND asia) OR (south-east* AND asia) OR "south east asia" OR "south eastern asia" OR borneo OR mekong OR "western asia" OR "middle east" OR "far east")

AND ((conspic* OR visib* OR illuminat* OR protect* OR visual OR perception OR headlight* OR head light* OR light* OR daytime running* OR day time running* OR running light* OR color OR colors OR colored OR colour* OR contrast* OR reflect* OR retro reflect* OR fluorescen* OR helmet* OR head protect* OR cloth* OR protective cloth* OR (wheel* AND reflect*) OR road safety OR road design* OR road engineering OR geometric design* OR traffic engineering OR curve* OR slope* OR bikeway* OR bike way* OR zebra cross* OR (intersection* AND (bicycle box* OR bike box* OR advanced cycle stop* OR advanced stop line*)) OR ((walkway* OR walk way* OR path OR paths OR pathway* OR path way* OR footpath* OR foot path* OR footway* OR foot way* OR sidewalk* OR side walk* OR pavement* OR platform* OR overpass* OR underpass* OR safety OR facility* OR track* OR mall OR malls OR refuge island* OR traffic island* OR splitter island* OR median* OR raised OR grade separat*) AND actuated controller*) OR signal* OR timing OR countdown OR count down OR phase OR safety fence* OR safety barrier* OR lane* OR facilit* OR boulevard* OR track* OR path OR paths OR pathway* OR path way* OR route* OR shoulder* OR road hazard* OR roadside hazard* OR segregat* OR friendly OR crossing* OR cross walk* OR crosswalk* OR school cross* OR footway* OR foot way* OR roundabout* OR round a bout* OR round about* OR traffic circle* OR intersection* OR junction* OR (((turning traffic OR right turn* OR left turn*))) OR ((((kerb OR kerbs OR curb OR curbs) AND radius))) OR (((speed AND (control* OR reduction OR limit OR limits OR countermeasure OR counter measure OR enforcement OR policing OR police* OR cushion* OR table* OR hump* OR bump* OR platform* OR plateau* OR chicane* OR deflection OR raised stop line* OR road narrowing* OR lane width* OR gateway* OR divert* OR diversion* OR sign OR signs OR signage* OR signal* OR design* OR monitor*)))) OR (((traffic AND (calming OR restraint OR management)))) OR (((speed camera* OR red light camera*))) OR (((delineation OR pavement mark* OR line mark* OR rumble strip* OR reflector*)))) OR ("protective clothing/utilization"[Mesh:noexp] OR "seat belts/utilization"[Mesh:noexp] OR "head protective devices/utilization"[Mesh:noexp] OR "child restraint systems/utilization"[Mesh:noexp] OR "protective devices/utilization"[Mesh:noexp] OR "environment design"[Mesh:noexp] OR "Architectural Accessibility/legislation and jurisprudence"[Mesh:noexp] OR "Architectural Accessibility/methods"[Mesh:noexp] OR "architectural accessibility"[Mesh:noexp] OR "law enforcement"[Mesh:noexp] OR "social control, formal"[Mesh:noexp] OR "licensure"[Mesh:noexp] OR "risk factors"[Mesh:noexp] OR "risk reduction behavior"[Mesh:noexp] OR "health behavior"[Mesh:noexp] OR "health education"[Mesh:noexp]))

AND (((school* OR work OR workplace OR work place* OR commut* OR travel* OR occupation* OR livelihood* OR driver*)

AND (safety OR accident* OR crash*)) OR ("transportation"[Mesh:noexp] OR "workplace"[Mesh:noexp] OR "schools"[Mesh:noexp] OR "accident prevention"[Mesh:noexp] OR "accidents, Traffic"[Majr:noexp] OR "accidents, traffic/mortality"[Mesh:noexp] OR "accidents, traffic/prevention and control"[Mesh:noexp] OR "accidents, traffic/legislation and jurisprudence"[Mesh:noexp] OR "walking/injuries"[Mesh:noexp] OR "bicycling/injuries"[Mesh:noexp] OR "Wounds and Injuries/mortality"[Mesh:noexp] OR "Wounds and Injuries/prevention and control"[Mesh:noexp] OR "craniocerebral trauma/mortality"[Mesh] OR "craniocerebral trauma/prevention and control"[Mesh] OR "safety"[Mesh:noexp]) OR (Acceptance OR Acquiesc* OR Adherence OR Amenability OR Amenableness OR Assent* OR Complaisance OR Complianc* OR Concurrence OR Conform* OR Consent* OR Cooperat* OR Co-operat* OR Deference OR Obedience OR Observance OR Observation OR Passivity OR Tractability OR Willingness))

**Publication date from 1990/01/01 to 2018/12/31**

**Results = 16704**
